# Supplementary material for: Association of Thymidylate Synthase (TS) Gene Polymorphisms with Incidence and Prognosis of Coronary Artery Disease
Source: MDPI journal article supplement (doi:10.3390/ijms241612591), 2023-08-09
Supplement: s1 [file s1]

**Table S1.** Stratified Analysis of *TS* gene polymorphisms for combined clinical factors in CAD patients and control subjects

| Variables      | Model     | TSER 2R/3R           |       | TS 1100T>C          |       | TS 1170A>G          |       | TS 1494ins/del      |       |
|----------------|-----------|----------------------|-------|---------------------|-------|---------------------|-------|---------------------|-------|
|                |           | AOR (95% CI)         | P     | AOR (95% CI)        | P     | AOR (95% CI)        | P     | AOR (95% CI)        | P     |
| Age            |           |                      |       |                     |       |                     |       |                     |       |
| ≤63years       | Dominant  | 0.668 (0.419-1.066)  | 0.091 | 1.210 (0.786-1.864) | 0.387 | 0.837 (0.541-1.295) | 0.425 | 0.864 (0.561-1.330) | 0.507 |
|                | Recessive | 1.284 (0.270-6.119)  | 0.753 | 1.326 (0.669-2.628) | 0.419 | 0.328 (0.123-0.878) | 0.026 | 0.958 (0.484-1.897) | 0.903 |
| >63years       | Dominant  | 1.133 (0.737-1.744)  | 0.569 | 1.293 (0.880-1.899) | 0.191 | 0.671 (0.454-0.991) | 0.045 | 0.816 (0.556-1.199) | 0.301 |
|                | Recessive | 1.200 (0.291-4.956)  | 0.801 | 1.065 (0.482-2.356) | 0.876 | 0.708 (0.317-1.583) | 0.401 | 0.799 (0.378-1.688) | 0.556 |
| Gender         |           |                      |       |                     |       |                     |       |                     |       |
| male           | Dominant  | 0.982 (0.589-1.639)  | 0.945 | 1.812 (0.868-3.783) | 0.113 | 0.510 (0.317-0.819) | 0.005 | 0.694 (0.436-1.104) | 0.123 |
|                | Recessive | 1.324 (0.278-6.303)  | 0.724 | 1.812 (0.868-3.783) | 0.113 | 0.277 (0.086-0.893) | 0.032 | 1.056 (0.502-2.221) | 0.885 |
| female         | Dominant  | 0.907 (0.606-1.358)  | 0.636 | 1.440 (0.992-2.089) | 0.055 | 0.890 (0.614-1.290) | 0.538 | 1.043 (0.721-1.509) | 0.823 |
|                | Recessive | 1.349 (0.327-5.556)  | 0.679 | 0.805 (0.381-1.698) | 0.569 | 0.613 (0.290-1.295) | 0.200 | 0.873 (0.441-1.726) | 0.696 |
| HTN            |           |                      |       |                     |       |                     |       |                     |       |
| No             | Dominant  | 0.668 (0.427-1.045)  | 0.077 | 1.324 (0.889-1.972) | 0.167 | 0.915 (0.611-1.371) | 0.667 | 0.794 (0.534-1.181) | 0.254 |
|                | Recessive | 1.895 (0.476-7.540)  | 0.364 | 1.226 (0.609-2.470) | 0.568 | 0.558 (0.236-1.322) | 0.185 | 0.833 (0.400-1.732) | 0.624 |
| Yes            | Dominant  | 1.310 (0.828-2.072)  | 0.249 | 1.307 (0.859-1.989) | 0.212 | 0.555 (0.363-0.848) | 0.007 | 0.966 (0.635-1.469) | 0.872 |
|                | Recessive | 0.523 (0.109-2.503)  | 0.417 | 1.283 (0.595-2.768) | 0.526 | 0.445 (0.182-1.088) | 0.076 | 0.991 (0.490-2.006) | 0.980 |
| DM             |           |                      |       |                     |       |                     |       |                     |       |
| No             | Dominant  | 0.924 (0.653-1.308)  | 0.657 | 1.224 (0.892-1.680) | 0.211 | 0.855 (0.622-1.177) | 0.337 | 0.810 (0.591-1.112) | 0.192 |
|                | Recessive | 0.943 (0.315-2.824)  | 0.916 | 1.068 (0.597-1.908) | 0.825 | 0.484 (0.234-1.001) | 0.050 | 0.763 (0.431-1.350) | 0.353 |
| Yes            | Dominant  | 0.961 (0.459-2.013)  | 0.916 | 1.770 (0.884-3.544) | 0.107 | 0.323 (0.155-0.674) | 0.003 | 1.239 (0.628-2.446) | 0.537 |
|                | Recessive | N/A                  | 0.998 | 1.890 (0.556-6.419) | 0.308 | 0.551 (0.162-1.870) | 0.339 | 1.782 (0.531-5.978) | 0.350 |
| Lipid          |           |                      |       |                     |       |                     |       |                     |       |
| No             | Dominant  | 0.833 (0.583-1.191)  | 0.317 | 1.231 (0.885-1.711) | 0.217 | 0.757 (0.542-1.057) | 0.102 | 0.941 (0.677-1.308) | 0.716 |
|                | Recessive | 0.953 (0.273-3.328)  | 0.939 | 1.296 (0.729-2.303) | 0.377 | 0.480 (0.228-1.014) | 0.054 | 1.036 (0.582-1.845) | 0.903 |
| Yes            | Dominant  | 1.273 (0.656-2.467)  | 0.475 | 1.432 (0.794-2.585) | 0.233 | 0.699 (0.392-1.245) | 0.224 | 0.673 (0.375-1.207) | 0.184 |
|                | Recessive | 1.632 (0.259-10.304) | 0.602 | 0.836 (0.271-2.574) | 0.754 | 0.598 (0.199-1.797) | 0.360 | 0.568 (0.202-1.598) | 0.284 |
| Smoking status |           |                      |       |                     |       |                     |       |                     |       |
| No             | Dominant  | 1.146 (0.788-1.666)  | 0.477 | 1.138 (0.809-1.600) | 0.457 | 0.715 (0.507-1.007) | 0.055 | 0.845 (0.601-1.188) | 0.333 |
|                | Recessive | 1.236 (0.358-4.271)  | 0.738 | 0.937 (0.483-1.819) | 0.848 | 0.457 (0.219-0.956) | 0.038 | 0.859 (0.461-1.600) | 0.632 |
| Yes            | Dominant  | 0.555 (0.301-1.021)  | 0.058 | 2.016 (1.159-3.507) | 0.013 | 0.736 (0.421-1.285) | 0.281 | 1.014 (0.592-1.739) | 0.959 |
|                | Recessive | 0.935 (0.139-6.273)  | 0.945 | 1.914 (0.847-4.326) | 0.119 | 0.583 (0.183-1.857) | 0.361 | 1.064 (0.457-2.475) | 0.886 |
| Homocysteine   |           |                      |       |                     |       |                     |       |                     |       |
| ≤11.40μmol/l   | Dominant  | 0.848 (0.590-1.217)  | 0.370 | 1.203 (0.864-1.675) | 0.274 | 0.703 (0.502-0.985) | 0.041 | 0.843 (0.606-1.174) | 0.312 |
|                | Recessive | 1.771 (0.578-5.431)  | 0.317 | 1.216 (0.675-2.190) | 0.515 | 0.157 (0.052-0.471) | 0.001 | 0.820 (0.464-1.449) | 0.494 |
| >11.40μmol/l   | Dominant  | 0.992 (0.508-1.936)  | 0.981 | 1.566 (0.852-2.881) | 0.149 | 0.695 (0.383-1.260) | 0.231 | 0.928 (0.509-1.692) | 0.808 |
|                | Recessive | N/A                  | 0.998 | 1.370 (0.467-4.023) | 0.567 | 1.063 (0.393-2.874) | 0.904 | 1.528 (0.507-4.607) | 0.452 |
| Folate         |           |                      |       |                     |       |                     |       |                     |       |
| ≥4.85ng/ml     | Dominant  | 0.787 (0.537-1.155)  | 0.222 | 1.350 (0.955-1.909) | 0.089 | 0.679 (0.480-0.961) | 0.029 | 0.949 (0.673-1.340) | 0.768 |
|                | Recessive | 1.539 (0.447-5.294)  | 0.495 | 1.236 (0.669-2.286) | 0.499 | 0.425 (0.188-0.961) | 0.040 | 0.978 (0.548-1.746) | 0.941 |
| <4.85ng/ml     | Dominant  | 1.274 (0.666-2.436)  | 0.464 | 1.248 (0.688-2.265) | 0.467 | 0.913 (0.494-1.686) | 0.771 | 1.015 (0.557-1.848) | 0.962 |
|                | Recessive | 1.609 (0.151-17.161) | 0.694 | 1.430 (0.448-4.566) | 0.547 | 0.345 (0.094-1.265) | 0.108 | 1.229 (0.335-4.504) | 0.756 |

Adjusted by age, gender, hypertension, diabetes mellitus, hyperlipidemia, and smoke.

**Table S2.** Adjusted odds ratios for CAD risk associated with *TS* gene polymorphisms, combined by clinical factors

| Characteristics   | <i>TSER</i>         |                     | <i>TS 1100T&gt;C</i> |                     | <i>TS 1170A&gt;G</i> |                     | <i>TS 1494 0bp/6bp</i> |                     |
|-------------------|---------------------|---------------------|----------------------|---------------------|----------------------|---------------------|------------------------|---------------------|
|                   | 3R3R                | 3R2R+2R2R           | TT                   | TC+CC               | AA                   | AG+GG               | 0bo0bp                 | 0bp6bp+6bp6bp       |
| Age               |                     |                     |                      |                     |                      |                     |                        |                     |
| ≤63years          | 1.000 (reference)   | 0.668 (0.419-1.066) | 1.000 (reference)    | 1.210 (0.786-1.864) | 1.000 (reference)    | 0.837 (0.541-1.295) | 1.000 (reference)      | 0.864 (0.561-1.330) |
| >63years          | 0.876 (0.621-1.234) | 1.010 (0.637-1.600) | 0.962 (0.628-1.471)  | 1.290 (0.845-1.967) | 1.093 (0.718-1.665)  | 0.752 (0.493-1.147) | 1.033 (0.677-1.575)    | 0.813 (0.532-1.244) |
| Gender            |                     |                     |                      |                     |                      |                     |                        |                     |
| male              | 1.000 (reference)   | 0.982 (0.589-1.639) | 1.000 (reference)    | 1.150 (0.727-1.818) | 1.000 (reference)    | 0.510 (0.317-0.819) | 1.000 (reference)      | 0.694 (0.436-1.104) |
| female            | 0.768 (0.512-1.155) | 0.652 (0.407-1.046) | 0.464 (0.275-0.784)  | 0.623 (0.381-1.018) | 0.403 (0.252-0.644)  | 0.518 (0.321-0.836) | 0.441 (0.260-0.748)    | 0.404 (0.245-0.667) |
| Hypertension      |                     |                     |                      |                     |                      |                     |                        |                     |
| No                | 1.000 (reference)   | 0.668 (0.427-1.045) | 1.000 (reference)    | 1.324 (0.889-1.972) | 1.000 (reference)    | 0.915 (0.611-1.371) | 1.000 (reference)      | 0.794 (0.534-1.181) |
| Yes               | 1.378 (0.979-1.941) | 1.661 (1.050-2.630) | 1.664 (1.087-2.546)  | 2.122 (1.401-3.215) | 1.797 (1.176-2.745)  | 1.172 (0.764-1.796) | 1.524 (0.992-2.342)    | 1.406 (0.942-2.099) |
| Diabetes mellitus |                     |                     |                      |                     |                      |                     |                        |                     |
| No                | 1.000 (reference)   | 0.924 (0.653-1.308) | 1.000 (reference)    | 1.224 (0.892-1.680) | 1.000 (reference)    | 0.855 (0.622-1.177) | 1.000 (reference)      | 0.810 (0.591-1.112) |
| Yes               | 2.865 (1.841-4.458) | 2.414 (1.277-4.564) | 2.394 (1.405-4.079)  | 3.996 (2.329-6.855) | 4.239 (2.362-7.609)  | 1.695 (1.013-2.836) | 2.421 (1.423-4.117)    | 2.963 (1.721-5.102) |
| Hyperlipidemia    |                     |                     |                      |                     |                      |                     |                        |                     |
| No                | 1.000 (reference)   | 0.833 (0.583-1.191) | 1.000 (reference)    | 1.231 (0.885-1.711) | 1.000 (reference)    | 0.757 (0.542-1.057) | 1.000 (reference)      | 0.941 (0.677-1.308) |
| Yes               | 1.245 (0.852-1.820) | 1.390 (0.770-2.509) | 1.372 (0.865-2.175)  | 1.861 (1.134-3.054) | 1.495 (0.932-2.397)  | 1.037 (0.640-1.680) | 1.632 (1.027-2.591)    | 1.066 (0.657-1.730) |
| Smoking           |                     |                     |                      |                     |                      |                     |                        |                     |
| No                | 1.000 (reference)   | 1.146 (0.788-1.666) | 1.000 (reference)    | 1.138 (0.809-1.600) | 1.000 (reference)    | 0.715 (0.507-1.007) | 1.000 (reference)      | 0.845 (0.601-1.188) |
| Yes               | 0.875 (0.566-1.351) | 0.504 (0.278-0.914) | 0.407 (0.231-0.717)  | 0.724 (0.435-1.205) | 0.541 (0.336-0.871)  | 0.484 (0.272-0.860) | 0.496 (0.284-0.868)    | 0.463 (0.277-0.774) |
| Homocysteine      |                     |                     |                      |                     |                      |                     |                        |                     |
| ≤11.40μmol/l      | 1.000 (reference)   | 0.888 (0.622-1.268) | 1.000 (reference)    | 1.180 (0.852-1.635) | 1.000 (reference)    | 0.746 (0.535-1.039) | 1.000 (reference)      | 0.833 (0.602-1.154) |
| >11.40μmol/l      | 1.129 (0.752-1.695) | 1.106 (0.596-2.050) | 0.901 (0.540-1.504)  | 1.484 (0.905-2.433) | 1.038 (0.631-1.707)  | 0.749 (0.452-1.240) | 0.972 (0.584-1.618)    | 0.948 (0.580-1.550) |
| Folate            |                     |                     |                      |                     |                      |                     |                        |                     |
| ≥4.85ng/ml        | 1.000 (reference)   | 0.791 (0.550-1.137) | 1.000 (reference)    | 1.279 (0.920-1.778) | 1.000 (reference)    | 0.697 (0.501-0.970) | 1.000 (reference)      | 0.831 (0.598-1.153) |
| <4.85ng/ml        | 1.590 (1.053-2.399) | 2.250 (1.243-4.071) | 1.968 (1.182-3.277)  | 2.621 (1.585-4.333) | 1.698 (1.036-2.783)  | 1.420 (0.859-2.348) | 1.621 (0.979-2.685)    | 1.792 (1.089-2.947) |
| HDL-cholesterol   |                     |                     |                      |                     |                      |                     |                        |                     |
| ≥40(M), 50(F)     | 1.000 (reference)   | 0.468 (0.253-0.865) | 1.000 (reference)    | 0.941 (0.546-1.623) | 1.000 (reference)    | 1.442 (0.819-2.538) | 1.000 (reference)      | 0.648 (0.373-1.125) |
| <40(M), 50(F)     | 1.267 (0.789-2.035) | 1.585 (0.852-2.950) | 1.135 (0.640-2.014)  | 2.471 (1.294-4.717) | 2.556 (1.460-4.477)  | 1.565 (0.877-2.792) | 1.331 (0.735-2.410)    | 1.387 (0.759-2.535) |

Adjusted by age, gender, hypertension, diabetes mellitus, hyperlipidemia, and smoke.

Abbreviations: HDL-cholesterol; high density lipoprotein-cholesterols

**Table S3.** The 4 site haplotype analysis for *TS* gene polymorphisms in CAD patients and control subjects.

| Haplotype                    | Control (2n=854) | CAD (2n=848) | OR (95% CI)           | <i>P</i> <sup>a</sup> |
|------------------------------|------------------|--------------|-----------------------|-----------------------|
| <i>TSER/TS1100/1170/1494</i> |                  |              |                       |                       |
| 3R-T-A-0bp                   | 0.3554           | 0.3916       | 1.000 (reference)     |                       |
| 3R-T-A-6bp                   | 0.0250           | 0.0199       | 0.778 (0.400-1.514)   | 0.501                 |
| 3R-T-G-6bp                   | 0.0020           | 0.0038       | 1.373 (0.228-8.279)   | 1.000                 |
| 3R-C-A-6bp                   | 0.1744           | 0.1621       | 0.836 (0.633-1.106)   | 0.227                 |
| 3R-C-G-0bp                   | -                | 0.0036       | 6.411 (0.330-124.700) | 0.251                 |
| 3R-C-G-6bp                   | -                | -            | -                     | -                     |
| 2R-T-A-0bp                   | 0.0371           | 0.0242       | 0.601 (0.339-1.065)   | 0.087                 |
| 2R-T-A-6bp                   | 0.0087           | 0.0073       | 0.687 (0.236-2.002)   | 0.593                 |
| 2R-T-G-0bp                   | 0.0085           | 0.0188       | 2.093 (0.849-5.158)   | 0.136                 |
| 2R-T-G-6bp                   | 0.0019           | 0.0015       | 0.458 (0.041-5.078)   | 0.609                 |
| 2R-C-A-0bp                   | 0                | -            | -                     | -                     |
| 2R-C-A-6bp                   | 0.1053           | 0.0984       | 0.844 (0.603-1.182)   | 0.346                 |
| 2R-C-G-0bp                   | 0.0012           | 0            | 0.305 (0.012-7.528)   | 0.479                 |
| 2R-C-G-6bp                   | -                | 0.0042       | 8.242 (0.442-153.800) | 0.126                 |

Abbreviations: OR, odds ratio; 95% CI, 95% confidence interval; CAD, coronary artery disease; *TSER*, thymidylate synthase enhancer region; *TS*, thymidylate synthase; FDR, false discovery rate.

<sup>a</sup> *P*-value calculated by chi-square test and fisher's exact test. The *P*-value<0.05 showed the bold type in Table 3.

**Table S4.** The 3 site haplotype analysis for *TS* gene polymorphisms CAD patients and control subjects.

| Haplotype               | Control (2n=854) | CAD (2n=848) | OR (95% CI)              | <i>P</i> <sup>a</sup> |
|-------------------------|------------------|--------------|--------------------------|-----------------------|
| <i>TSER/TS1100/1170</i> |                  |              |                          |                       |
| 3R-T-A                  | 0.3781           | 0.4148       | 1.000 (Reference)        |                       |
| 3R-C-A                  | 0.1798           | 0.2118       | 1.073 (0.825 - 1.395)    | 0.601                 |
| 3R-C-G                  | -                | 0.0058       | 10.100 (0.556 - 183.400) | 0.063                 |
| 2R-T-G                  | 0.01             | 0.0218       | 1.835 (0.813 - 4.143)    | 0.117                 |
| 2R-C-A                  | 0.1026           | 0.0975       | 0.865 (0.619 - 1.211)    | 0.399                 |
| 2R-C-G                  | 0.0022           | 0.0045       | 1.835 (0.334 - 10.090)   | 0.688                 |
| <i>TSER/TS1100/1494</i> |                  |              |                          |                       |
| 3R-T-0bp                | 0.6336           | 0.6049       | 1.000 (Reference)        |                       |
| 3R-T-6bp                | 0.0253           | 0.0238       | 0.959 (0.517 - 1.778)    | 0.893                 |
| 3R-C-6bp                | 0.1746           | 0.1618       | 0.970 (0.746 - 1.260)    | 0.817                 |
| 2R-T-0bp                | 0.0454           | 0.0429       | 0.973 (0.609 - 1.556)    | 0.910                 |
| 2R-T-6bp                | 0.0111           | 0.0088       | 0.820 (0.303 - 2.219)    | 0.694                 |
| 2R-C-0bp                | 0                | 0            | -                        | -                     |
| 2R-C-6bp                | 0.1063           | 0.1028       | 1.008 (0.734 - 1.385)    | 0.960                 |
| <i>TSER/TS1170/1494</i> |                  |              |                          |                       |
| 3R-A-0bp                | 0.3592           | 0.4487       | 1.000 (Reference)        |                       |
| 3R-G-6bp                | 0.0034           | 0.0067       | 1.616 (0.401 - 6.516)    | 0.738                 |
| 2R-G-0bp                | 0.0098           | 0.0202       | 1.717 (0.731 - 4.032)    | 0.183                 |
| <i>TS1100/1170/1494</i> |                  |              |                          |                       |
| T-A-0bp                 | 0.392            | 0.4153       | 1.000 (Reference)        |                       |
| T-A-6bp                 | 0.0331           | 0.0273       | 0.782 (0.441 - 1.384)    | 0.395                 |
| T-G-6bp                 | 0.0033           | 0.0053       | 1.269 (0.282 - 5.714)    | 1.000                 |
| C-A-6bp                 | 0.2809           | 0.2612       | 0.876 (0.692 - 1.110)    | 0.273                 |
| C-G-0bp                 | 0.0012           | 0.004        | 2.855 (0.295 - 27.600)   | 0.625                 |
| C-G-6bp                 | -                | 0.0034       | 6.662 (0.343 - 129.600)  | 0.250                 |

Abbreviations: OR, odds ratio; 95% CI, 95% confidence interval; CAD, coronary artery disease; TSER, thymidylate synthase enhancer region; TS, thymidylate synthase; FDR, false discovery rate.

<sup>a</sup> *P*-value calculated by chi-square test and fisher's exact test. The *P*-value<0.05 showed the bold type in Table 3.

**Table S5.** The 2 site haplotype analysis for *TS* gene polymorphisms in CAD patients and control subjects.

| Haplotype           | Control (2n=854) | CAD (2n=848) | OR (95% CI)           | <i>P</i> <sup>a</sup> |
|---------------------|------------------|--------------|-----------------------|-----------------------|
| <i>TSER/TS1100</i>  |                  |              |                       |                       |
| 3R-T                | 0.6569           | 0.6282       | 1.000 (Reference)     |                       |
| 3R-C                | 0.1804           | 0.2173       | 1.258 (0.985 - 1.606) | 0.065                 |
| 2R-T                | 0.0586           | 0.0522       | 0.926 (0.607 - 1.413) | 0.722                 |
| 2R-C                | 0.1042           | 0.1023       | 1.029 (0.748 - 1.415) | 0.861                 |
| <i>TSER/TS 1494</i> |                  |              |                       |                       |
| 3R-0bp              | 0.6371           | 0.66         | 1.000 (Reference)     |                       |
| 3R-6bp              | 0.2002           | 0.1855       | 0.892 (0.697 - 1.141) | 0.363                 |
| 2R-0bp              | 0.0456           | 0.0428       | 0.897 (0.561 - 1.432) | 0.648                 |
| 2R-6bp              | 0.1172           | 0.1117       | 0.923 (0.681 - 1.251) | 0.605                 |
| <i>TS 1100/1170</i> |                  |              |                       |                       |
| T-A                 | 0.4259           | 0.4452       | 1.000 (Reference)     |                       |
| C-A                 | 0.2826           | 0.3095       | 1.047 (0.835 - 1.313) | 0.692                 |
| <i>TS 1100/1494</i> |                  |              |                       |                       |
| T-0bp               | 0.679            | 0.6478       | 1.000 (Reference)     |                       |
| T-6bp               | 0.0364           | 0.0326       | 0.954 (0.565 - 1.612) | 0.861                 |
| C-6bp               | 0.2809           | 0.2645       | 0.986 (0.794 - 1.224) | 0.899                 |

Abbreviations: OR, odds ratio; 95% CI, 95% confidence interval; CAD, coronary artery disease; *TSER*, thymidylate synthase enhancer region; *TS*, thymidylate synthase; FDR, false discovery rate.

<sup>a</sup> *P*-value calculated by chi-square test and fisher's exact test. The *P*-value<0.05 showed the bold type in Table 3.

**Table S6.** Genotype combination analyses for the *TS* gene polymorphisms in CAD patients and controls

| Genotype combinations                  | Controls<br>(n=427) | CAD<br>(n=424) | AOR (95% CI)           | P*    |
|----------------------------------------|---------------------|----------------|------------------------|-------|
| <i>TSER/TS 1100T&gt;C</i>              |                     |                |                        |       |
| 3R3R/TT                                | 182 (42.6)          | 166 (39.2)     | 1.000 (reference)      |       |
| 3R3R/TC                                | 99 (23.2)           | 110 (25.9)     | 1.259 (0.880 - 1.801)  | 0.207 |
| 3R3R/CC                                | 15 (3.5)            | 25 (5.9)       | 1.927 (0.951 - 3.906)  | 0.069 |
| 2R3R/TT                                | 33 (7.7)            | 27 (6.4)       | 0.847 (0.467 - 1.534)  | 0.583 |
| 2R3R/TC                                | 75 (17.6)           | 75 (17.7)      | 1.142 (0.753 - 1.732)  | 0.533 |
| 2R3R/CC                                | 15 (3.5)            | 13 (3.1)       | 0.705 (0.301 - 1.653)  | 0.421 |
| 2R2R/TT                                | 2 (0.5)             | 1 (0.2)        | 0.652 (0.053 - 8.053)  | 0.739 |
| 2R2R/TC                                | 3 (0.7)             | 4 (0.9)        | 1.718 (0.365 - 8.079)  | 0.493 |
| 2R2R/CC                                | 3 (0.7)             | 3 (0.7)        | 1.021 (0.174 - 6.003)  | 0.982 |
| <i>TSER/TS 1170A&gt;G</i>              |                     |                |                        |       |
| 3R3R/AA                                | 130 (30.4)          | 164 (38.7)     | 1.000 (reference)      |       |
| 2R3R/AG                                | 46 (10.8)           | 47 (11.1)      | 0.731 (0.435 - 1.229)  | 0.238 |
| 2R3R/GG                                | 3 (0.7)             | 3 (0.7)        | 0.865 (0.161 - 4.651)  | 0.866 |
| 2R2R/AA                                | 7 (1.6)             | 5 (1.2)        | 0.611 (0.169 - 2.214)  | 0.453 |
| 2R2R/AG                                | 1 (0.2)             | 3 (0.7)        | 2.368 (0.235 - 23.905) | 0.465 |
| 2R2R/GG                                | 0 (0.0)             | 0 (0.0)        | -                      | -     |
| <i>TSER/TS 1494ins&gt;del</i>          |                     |                |                        |       |
| 3R3R/0bp0bp                            | 170 (39.8)          | 187 (44.1)     | 1.000 (reference)      |       |
| 3R3R/0bp6bp                            | 107 (25.1)          | 95 (22.4)      | 0.819 (0.572 - 1.173)  | 0.277 |
| 3R3R/6bp6bp                            | 19 (4.4)            | 19 (4.5)       | 0.971 (0.485 - 1.945)  | 0.934 |
| 2R3R/0bp0bp                            | 24 (5.6)            | 23 (5.4)       | 0.802 (0.419 - 1.539)  | 0.508 |
| 2R3R/0bp6bp                            | 82 (19.2)           | 75 (17.7)      | 0.881 (0.587 - 1.323)  | 0.542 |
| 2R3R/6bp6bp                            | 17 (4.0)            | 17 (4.0)       | 0.709 (0.328 - 1.534)  | 0.382 |
| 2R2R/0bp0bp                            | 1 (0.2)             | 1 (0.2)        | 1.581 (0.083 - 30.228) | 0.761 |
| 2R2R/0bp6bp                            | 4 (0.9)             | 4 (0.9)        | 0.924 (0.221 - 3.873)  | 0.914 |
| 2R2R/6bp6bp                            | 3 (0.7)             | 3 (0.7)        | 0.925 (0.157 - 5.460)  | 0.932 |
| <i>TS 1100T&gt;C/TS 1170A&gt;G</i>     |                     |                |                        |       |
| TT/AA                                  | 70 (16.4)           | 86 (20.3)      | 1.000 (reference)      |       |
| TC/AA                                  | 109 (25.5)          | 109 (25.7)     | 0.866 (0.550 - 1.363)  | 0.534 |
| TC/AG                                  | 68 (15.9)           | 78 (18.4)      | 0.837 (0.511 - 1.370)  | 0.479 |
| TC/GG                                  | 0 (0.0)             | 2 (0.5)        | -                      | 0.995 |
| CC/AA                                  | 32 (7.5)            | 39 (9.2)       | 0.841 (0.442 - 1.602)  | 0.599 |
| CC/AG                                  | 1 (0.2)             | 2 (0.5)        | 1.973 (0.141 - 27.593) | 0.614 |
| CC/GG                                  | 0 (0.0)             | 0 (0.0)        | -                      | -     |
| <i>TS 1100T&gt;C/TS 1494ins&gt;del</i> |                     |                |                        |       |
| TT/0bp0bp                              | 194 (45.4)          | 180 (42.5)     | 1.000 (reference)      |       |
| TT/0bp6bp                              | 18 (4.2)            | 8 (1.9)        | 0.492 (0.199 - 1.214)  | 0.124 |
| TT/6bp6bp                              | 5 (1.2)             | 6 (1.4)        | 1.513 (0.414 - 5.528)  | 0.531 |
| TC/0bp6bp                              | 173 (40.5)          | 162 (38.2)     | 1.053 (0.772 - 1.436)  | 0.745 |
| TC/6bp6bp                              | 3 (0.7)             | 6 (1.4)        | 1.853 (0.432 - 7.953)  | 0.407 |
| CC/0bp0bp                              | 0 (0.0)             | 10 (2.4)       | -                      | 0.995 |
| CC/0bp6bp                              | 2 (0.5)             | 4 (0.9)        | 2.752 (0.461 - 16.411) | 0.267 |
| CC/6bp6bp                              | 31 (7.3)            | 27 (6.4)       | 0.871 (0.479 - 1.582)  | 0.650 |
| <i>TS 1170A&gt;G/TS 1494ins&gt;del</i> |                     |                |                        |       |
| AA/0bp0bp                              | 57 (13.3)           | 101 (23.8)     | 1.000 (reference)      |       |
| AG/6bp6bp                              | 2 (0.5)             | 3 (0.7)        | 1.140 (0.145 - 8.972)  | 0.901 |
| GG/0bp6bp                              | 0 (0.0)             | 2 (0.5)        | -                      | 0.995 |
| GG/6bp6bp                              | 0 (0.0)             | 0 (0.0)        | -                      | -     |

Abbreviation: AOR, adjusted odds ratio; 95% CI, 95% confidence interval; CAD, coronary artery disease; TS, thymidylate synthase. \*Adjusted by age, sex, hypertension, diabetes mellitus, hyperlipidemia, and smoking. The *P*-values <0.05 showed the bold type in Table 4

**Table S7.** Baseline characteristics between controls and CAD patients in sample 1 and 2

| Characteristic                                   | Sample 1*           |                         |                      | Sample 2**          |                         |                     |
|--------------------------------------------------|---------------------|-------------------------|----------------------|---------------------|-------------------------|---------------------|
|                                                  | Controls<br>(n=288) | CAD patients<br>(n=166) | <i>P</i>             | Controls<br>(n=139) | CAD patients<br>(n=251) | <i>P</i>            |
| Male (n, %)                                      | 95 (33.0)           | 58 (34.9)               | 0.766                | 73 (52.5)           | 96 (38.2)               | 0.091               |
| Age (years, mean ± SD)                           | 61.22±11.59         | 64.13±9.91              | 0.019 <sup>a</sup>   | 61.88±11.42         | 61.47±10.42             | 0.724               |
| Hypertension (n, %)                              | 114 (39.6)          | 92 (55.4)               | 0.048                | 57 (41.0)           | 133 (53.0)              | 0.178               |
| Diabetes mellitus (n, %)                         | 36 (12.5)           | 62 (37.3)               | <0.0001              | 15 (10.8)           | 55 (21.9)               | 0.020               |
| Hyperlipidemia (n, %)                            | 68 (23.6)           | 44 (26.5)               | 0.593                | 29 (20.9)           | 71 (28.3)               | 0.212               |
| Smoking (n, %)                                   | 75 (26.0)           | 45 (27.1)               | 0.850                | 61 (43.9)           | 61 (24.3)               | 0.005               |
| Body mass index (kg/cm <sup>2</sup> , mean ± SD) | 24.27±3.34          | 24.85±3.15              | 0.096                | 24.26±3.35          | 25.44±3.13              | 0.001               |
| Fasting blood sugar (mg/dL, mean ± SD)           | 110.42±35.02        | 153.61±70.51            | <0.0001 <sup>a</sup> | 115.11±31.55        | 133.80±58.45            | <0.001 <sup>a</sup> |
| HbA1c (% , mean ± SD)                            | 6.58±1.61           | 7.09±1.80               | 0.143                | 5.87±0.82           | 6.49±3.43               | 0.101 <sup>a</sup>  |
| HDL-C (mg/dl, mean ± SD)                         | 46.18±16.18         | 41.69±10.17             | 0.056 <sup>a</sup>   | 47.78±11.47         | 45.11±12.27             | 0.082               |
| LDL-C (mg/dl, mean ± SD)                         | 128.73±52.24        | 116.35±37.46            | 0.161 <sup>a</sup>   | 114.70±32.35        | 109.28±38.39            | 0.249               |
| Total cholesterol (mg/dl, mean ± SD)             | 196.25±40.05        | 189.03±45.68            | 0.023 <sup>a</sup>   | 189.59±33.74        | 184.64±44.59            | 0.124 <sup>a</sup>  |
| Triglyceride (mg/dl, mean ± SD)                  | 149.07±91.82        | 164.88±99.82            | 0.092                | 128.38±73.96        | 150.36±95.68            | 0.006 <sup>a</sup>  |
| Hcy (μmol/L, mean ± SD)                          | 9.41±3.37           | 10.62±4.21              | 0.001 <sup>a</sup>   | 10.50±4.74          | 9.52±5.57               | 0.001 <sup>a</sup>  |
| Folate (nmol/L, mean ± SD)                       | 9.28±8.31           | 10.51±14.34             | 0.551 <sup>a</sup>   | 8.87±7.17           | 7.59±5.27               | 0.019 <sup>a</sup>  |

*P-values* were calculated by two-sided t-test for continuous variables and chi-square test for categorical variables. <sup>a</sup> *P-values* were calculated by Mann-Whitney test for continuous variables. CAD, coronary artery disease; SD, standard deviation; HDL-C, high density lipoprotein-cholesterol; LDL-C, low density lipoprotein-cholesterol; Hcy, homocysteine; HbA1c, hemoglobin A1c. \* Sample 1 was recruited from 2000 to 2006. \*\* Sample 2 was recruited from 2007 to 2012.

**Table S8.** Genotype frequencies of *TS* gene polymorphisms between CAD patients and control subjects in samples 1 and 2

| Genotypes             | Sample 1**          |                         |                              |                       | Sample 2***         |                         |                       |                       |
|-----------------------|---------------------|-------------------------|------------------------------|-----------------------|---------------------|-------------------------|-----------------------|-----------------------|
|                       | Controls<br>(n=288) | CAD patients<br>(n=166) | AOR (95% CI)*                | <i>P</i> <sup>a</sup> | Controls<br>(n=139) | CAD patients<br>(n=251) | AOR (95% CI)*         | <i>P</i> <sup>a</sup> |
| <i>TSER</i> 2R/3R     |                     |                         |                              |                       |                     |                         |                       |                       |
| 3R3R                  | 205 (71.2)          | 119 (71.7)              | 1.000 (reference)            |                       | 91 (65.5)           | 175 (69.7)              | 1.000 (reference)     |                       |
| 2R3R                  | 80 (27.8)           | 46 (27.7)               | 1.044 (0.654 - 1.665)        | 0.857                 | 43 (30.9)           | 69 (27.5)               | 0.799 (0.489 - 1.305) | 0.370                 |
| 2R2R                  | 3 (1.0)             | 1 (0.6)                 | 1.129 (0.100 - 12.707)       | 0.922                 | 5 (3.6)             | 7 (2.8)                 | 0.786 (0.233 - 2.658) | 0.699                 |
| Dominant model        |                     |                         | 1.045 (0.658 - 1.660)        | 0.852                 |                     |                         | 0.793 (0.495 - 1.271) | 0.336                 |
| Recessive model       |                     |                         | 1.042 (0.095 - 11.393)       | 0.973                 |                     |                         | 0.794 (0.235 - 2.688) | 0.711                 |
| <i>TS</i> 1100T>C     |                     |                         |                              |                       |                     |                         |                       |                       |
| TT                    | 150 (52.1)          | 63 (38.0)               | 1.000 (reference)            |                       | 67 (48.2)           | 126 (50.2)              | 1.000 (reference)     |                       |
| TC                    | 118 (41.0)          | 80 (48.2)               | <b>1.800 (1.156 - 2.804)</b> | <b>0.009</b>          | 59 (42.4)           | 107 (42.6)              | 0.964 (0.608 - 1.529) | 0.876                 |
| CC                    | 20 (6.9)            | 23 (13.9)               | <b>2.741 (1.300 - 5.783)</b> | <b>0.008</b>          | 13 (9.4)            | 18 (7.2)                | 0.732 (0.302 - 1.774) | 0.490                 |
| Dominant model        |                     |                         | <b>1.949 (1.274 - 2.983)</b> | <b>0.002</b>          |                     |                         | 0.937 (0.602 - 1.458) | 0.773                 |
| Recessive model       |                     |                         | <b>2.044 (1.029 - 4.061)</b> | <b>0.041</b>          |                     |                         | 0.790 (0.350 - 1.783) | 0.570                 |
| <i>TS</i> 1170A>G     |                     |                         |                              |                       |                     |                         |                       |                       |
| AA                    | 140 (48.6)          | 112 (67.5)              | 1.000 (reference)            |                       | 71 (51.1)           | 118 (47.0)              | 1.000 (reference)     |                       |
| AG                    | 124 (43.1)          | 47 (28.3)               | <b>0.470 (0.298 - 0.744)</b> | <b>0.001</b>          | 59 (42.4)           | 123 (49.0)              | 1.022 (0.642 - 1.626) | 0.928                 |
| GG                    | 24 (8.3)            | 7 (4.2)                 | <b>0.341 (0.129 - 0.900)</b> | <b>0.030</b>          | 9 (6.5)             | 10 (4.0)                | 0.492 (0.177 - 1.365) | 0.173                 |
| Dominant model        |                     |                         | <b>0.447 (0.290 - 0.691)</b> | <b>0.0003</b>         |                     |                         | 0.965 (0.617 - 1.511) | 0.877                 |
| Recessive model       |                     |                         | 0.481 (0.191 - 1.210)        | 0.120                 |                     |                         | 0.575 (0.217 - 1.525) | 0.266                 |
| <i>TS</i> 1494ins/del |                     |                         |                              |                       |                     |                         |                       |                       |
| 0bp0bp                | 135 (46.9)          | 78 (47.0)               | 1.000 (reference)            |                       | 60 (43.2)           | 128 (51.0)              | 1.000 (reference)     |                       |
| 0bp6bp                | 127 (44.1)          | 68 (41.0)               | 0.978 (0.632 - 1.512)        | 0.920                 | 66 (47.5)           | 104 (41.4)              | 0.750 (0.473 - 1.191) | 0.223                 |
| 6bp6bp                | 26 (9.0)            | 20 (12.0)               | 1.286 (0.633 - 2.611)        | 0.487                 | 13 (9.4)            | 19 (7.6)                | 0.685 (0.286 - 1.642) | 0.397                 |
| Dominant model        |                     |                         | 1.031 (0.681 - 1.560)        | 0.887                 |                     |                         | 0.751 (0.482 - 1.170) | 0.205                 |
| Recessive model       |                     |                         | 1.270 (0.651 - 2.477)        | 0.484                 |                     |                         | 0.839 (0.376 - 1.874) | 0.669                 |

AOR, adjusted odds ratio; 95% CI, 95% confidence interval; CAD, coronary artery disease; *TSER*, thymidylate synthase enhancer region; *TS*, thymidylate synthase; HW, Hardy-Weinberg equilibrium. The *P*-value<0.05 showed the bold type in supplementary table 6.

\*The AOR on the basis of risk factors such as age, gender, hypertension, diabetes mellitus, hyperlipidemia, and smoking.

<sup>a</sup> *P*-value calculated by multivariable logistic regression.

\*\* Sample 1 was recruited from 2000 to 2006. \*\*\* Sample 2 was recruited from 2007 to 2012.



**Table S9.** Genotype frequencies of *TS* gene polymorphisms between stable CAD, ACS patients and control subjects

| Genotypes             | Controls<br>(n=427) | Stable CAD<br>(n=205) | AOR (95% CI)*         | <i>P</i> <sup>a</sup> | ACS<br>(n=219) | AOR (95% CI)*                | <i>P</i> <sup>a</sup> |
|-----------------------|---------------------|-----------------------|-----------------------|-----------------------|----------------|------------------------------|-----------------------|
| <i>TSER</i> 2R/3R     |                     |                       |                       |                       |                |                              |                       |
| 3R3R                  | 296 (69.3)          | 148 (72.2)            | 1.000 (reference)     |                       | 153 (69.9)     | 1.000 (reference)            |                       |
| 2R3R                  | 123 (28.8)          | 52 (25.4)             | 0.804 (0.536 - 1.205) | 0.291                 | 63 (28.8)      | 1.054 (0.713 - 1.560)        | 0.791                 |
| 2R2R                  | 8 (1.9)             | 5 (2.4)               | 1.480 (0.463 - 4.732) | 0.509                 | 3 (1.4)        | 0.701 (0.167 - 2.941)        | 0.627                 |
| Dominant model        |                     |                       | 0.846 (0.573 - 1.250) | 0.402                 |                | 1.033 (0.703 - 1.517)        | 0.869                 |
| Recessive model       |                     |                       | 1.544 (0.485 - 4.921) | 0.463                 |                | 0.699 (0.167 - 2.930)        | 0.624                 |
| <i>TS</i> 1100T>C     |                     |                       |                       |                       |                |                              |                       |
| TT                    | 217 (50.8)          | 93 (45.4)             | 1.000 (reference)     |                       | 101 (46.1)     | 1.000 (reference)            |                       |
| TC                    | 177 (41.5)          | 96 (46.8)             | 1.259 (0.873 - 1.814) | 0.217                 | 93 (42.5)      | 1.211 (0.836 - 1.754)        | 0.311                 |
| CC                    | 33 (7.7)            | 16 (7.8)              | 0.984 (0.486 - 1.992) | 0.965                 | 25 (11.4)      | 1.654 (0.892 - 3.069)        | 0.110                 |
| Dominant model        |                     |                       | 1.220 (0.858 - 1.735) | 0.267                 |                | 1.290 (0.907 - 1.835)        | 0.156                 |
| Recessive model       |                     |                       | 0.911 (0.466 - 1.782) | 0.786                 |                | 1.554 (0.867 - 2.784)        | 0.139                 |
| <i>TS</i> 1170A>G     |                     |                       |                       |                       |                |                              |                       |
| AA                    | 211 (49.4)          | 104 (50.7)            | 1.000 (reference)     |                       | 130 (59.4)     | 1.000 (reference)            |                       |
| AG                    | 183 (42.9)          | 93 (45.4)             | 0.936 (0.650 - 1.348) | 0.721                 | 79 (36.1)      | <b>0.605 (0.416 - 0.881)</b> | <b>0.009</b>          |
| GG                    | 33 (7.7)            | 8 (3.9)               | 0.459 (0.197 - 1.069) | 0.071                 | 10 (4.6)       | <b>0.428 (0.191 - 0.957)</b> | <b>0.039</b>          |
| Dominant model        |                     |                       | 0.863 (0.606 - 1.228) | 0.412                 |                | <b>0.579 (0.404 - 0.830)</b> | <b>0.003</b>          |
| Recessive model       |                     |                       | 0.483 (0.214 - 1.088) | 0.079                 |                | 0.553 (0.258 - 1.187)        | 0.129                 |
| <i>TS</i> 1494ins/del |                     |                       |                       |                       |                |                              |                       |
| 0bp0bp                | 195 (45.7)          | 94 (45.9)             | 1.000 (reference)     |                       | 117 (53.4)     | 1.000 (reference)            |                       |
| 0bp6bp                | 193 (45.2)          | 94 (45.9)             | 1.047 (0.726 - 1.509) | 0.807                 | 80 (36.5)      | 0.707 (0.488 - 1.026)        | 0.068                 |
| 6bp6bp                | 39 (9.1)            | 17 (8.3)              | 0.775 (0.392 - 1.531) | 0.463                 | 22 (10.0)      | 0.968 (0.524 - 1.787)        | 0.916                 |
| Dominant model        |                     |                       | 0.998 (0.702 - 1.418) | 0.991                 |                | 0.752 (0.530 - 1.069)        | 0.112                 |
| Recessive model       |                     |                       | 0.784 (0.412 - 1.490) | 0.457                 |                | 1.132 (0.632 - 2.027)        | 0.677                 |

AOR, adjusted odds ratio; 95% CI, 95% confidence interval; CAD, coronary artery disease; ACS, acute coronary syndrome; *TSER*, thymidylate synthase enhancer region; *TS*, thymidylate synthase; HWE, Hardy–Weinberg equilibrium.

\*The AOR on the basis of risk factors such as age, gender, hypertension, diabetes mellitus, hyperlipidemia, and smoking.

<sup>a</sup> *P*-value calculated by multivariable logistic regression.

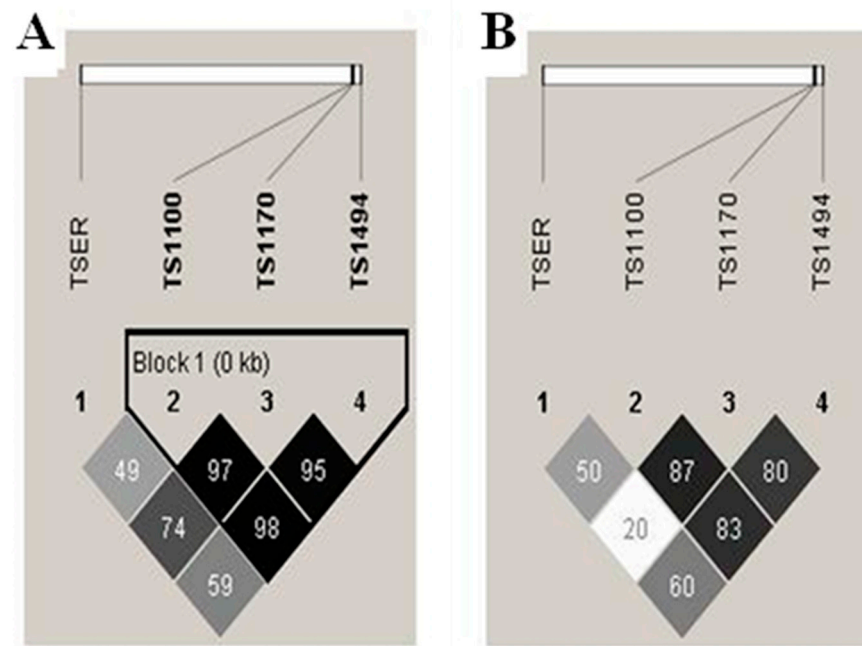

**Figure S1.** LD patterns of *TS* gene polymorphisms. The values in the squares denote LD between single markers. (A) Control subjects exhibited strong LD block that *TS* 1100/1170/1494 haplotype. (B) Patients with CAD not exhibited LD block. Dark squares indicate high  $r^2$  values and light squares indicate low  $r^2$  values. LD, linkage disequilibrium; *TS*, thymidylate synthase; CAD, coronary artery disease.
